# Supplementary material for: Ultrasensitive detection of vitamin E by signal conversion combined with core-satellite structure-based plasmon coupling effect
Source: Royal Society of Chemistry journal article supplement (doi:10.1039/d1an02289j), 2022-01-01
Supplement: d1an02289j1.pdf [file d1an02289j1.pdf]

## Supporting Information

### **Ultrasensitive Detection of Vitamin E by Signal Conversion Combined with Core-satellite Structure-based Plasmon Coupling Effect**

Keying Xu,<sup>a</sup> Jing Li,<sup>a</sup> Qingyi Han,<sup>a</sup> Dingding Zhang,<sup>a</sup> Libing Zhang,<sup>a</sup> Zhen Zhang,<sup>\*a</sup> and  
Xiaoquan Lu<sup>\*b</sup>

<sup>a</sup> Tianjin Key Laboratory of Molecular Optoelectronic, Department of Chemistry,  
School of Science, Tianjin University, Tianjin, 300072, P. R. China.

<sup>b</sup> Key Laboratory of Bioelectrochemistry and Environmental Analysis of Gansu  
Province, College of Chemistry and Chemical Engineering, Northwest Normal  
University, Lanzhou 730070, P. R. China.

\*E-mail: zhzhen@tju.edu.cn

\*E-mail: luxq@nwnu.edu.cn

---

## Table of contents

### Experimental Section

**Figure S1.** The morphology at high  $\text{AgNO}_3$  concentration had big and irregular crystals on  $\text{SiO}_2$  NPs.

**Figure S2.** UV-vis spectrum of NaOH at different concentrations.

**Figure S3.** UV-vis spectrum at different times (from 15 to 90 min).

**Figure S4.** FI-RT spectrum of  $\text{SiO}_2$  NPs (black curve) and  $\text{Au@SiO}_2$  NPs (red curve).

**Figure S5.** TEM image (a) and nanoparticle size distribution (b) of  $\text{SiO}_2$  NPs.

**Figure S6.** (a) TEM image of  $\text{Au@SiO}_2$  NPs. (b) The nanoparticle size distribution of Au NPs.

**Figure S7.** The nanoparticle size distribution of  $\text{Ag@Au}$  NPs.

**Figure S8.** UV-vis spectra of  $\text{SiO}_2$ ,  $\text{Au@SiO}_2$  NPs, and  $\text{Ag@Au@SiO}_2$  NPs.

**Figure S9.** HRTEM image collected from the satellite structure.

**Figure S10.** XPS spectra of  $\text{Ag@Au@SiO}_2$  NPs.

**Figure S11.** XPS spectra of (a) Au 4f and (b) Ag 3d in the  $\text{Ag@Au@SiO}_2$  NPs.

**Figure S12.** The histogram of different substances including 40 mM VE, Pro, His, Phe, Cys, and Val.

---

## EXPERIMENTAL SECTION

### Materials

Silver nitrate (AgNO<sub>3</sub>), gold (III) chloride trihydrate (HAuCl<sub>4</sub>·3H<sub>2</sub>O), tetraethyl orthosilicate (TEOS), ammonium hydroxide (NH<sub>3</sub>·H<sub>2</sub>O), 4-aminothiophenol (4-ATP), (R)-2,5,7,8-Tetramethyl-2-((4R,8R)-4,8,12-trimethyltridecyl)chroman-6-ol (VE) and 3-aminopropyltriethoxysilane (APTMS) were all purchased from Shanghai Aladdin Biochemical Technology Co., Ltd. Polyvinyl pyrrolidone (Mv = 48000, PVP), ethanol (75%, EtOH), sodium borohydride (NaBH<sub>4</sub>) and sodium hydroxide (NaOH) were purchased from Sun Chemical Technology (Shanghai) Co., Ltd. Histidine (His), phenylalanine (Phe), L-cysteine (Cys), valine (Val), proline (Pro) were purchased from Tianjin Guangfu Institute of Fine Chemicals. The chemical reagents used in the experiment were not further purified. The water used in the experiment was ultrapure water (>18.2 MΩ). The serum sample used in the experiment came from the First Affiliated Hospital of Tianjin University of Traditional Chinese Medicine.

### Instruments

The Ultraviolet-visible (Uv-vis) spectra were obtained using UV-756CRT (China). The Raman spectroscopy from Thermo Fisher Raman spectrometer (DXR2xi, USA). Characterization information such as topography and size were obtained by scanning electron microscope Hitachi (SU8010, Japan). TEM (transmission electron microscope), HRTEM (high-resolution TEM), and elemental mapping analyses were conducted on a JEOL-2100F. Other characterization instruments included: X-ray photoelectron spectroscopy analyzer (Thermo Fisher K-Alpha, USA) and Fourier transform infrared spectrometer (Nicolet-iS50, USA).

### The formula for calculating Raman enhancement factor.

$$\text{Raman enhancement factor} = \frac{I_{SERS} \times C_{dis}}{I_{Raman} \times C_{ad} \times f_{sh}}$$

$I_{SERS}$  and  $I_{Raman}$  represent the Raman intensity of Ag@AuSiO<sub>2</sub> NPs and pure 4-ATP solution at 1079 cm<sup>-1</sup> respectively.  $C_{dis}$  and  $C_{ad}$  represent the concentration of

---

4-ATP adsorbed on the surface of nanoparticles in the solution.  $f_{sh}$  factor represents the shielding of the excited light and scattered light by the colloid particles, we took the value of 0.25 for this factor.<sup>1</sup>

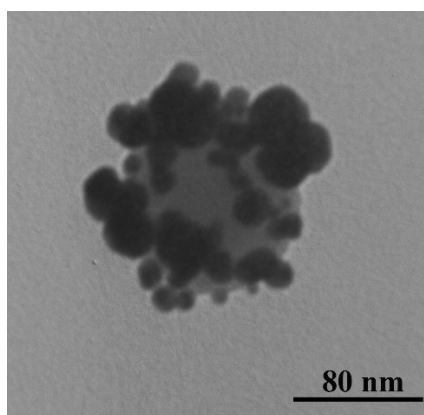

**Figure S1.** The morphology at high  $\text{AgNO}_3$  concentration had big and irregular crystals on  $\text{SiO}_2$  NPs.

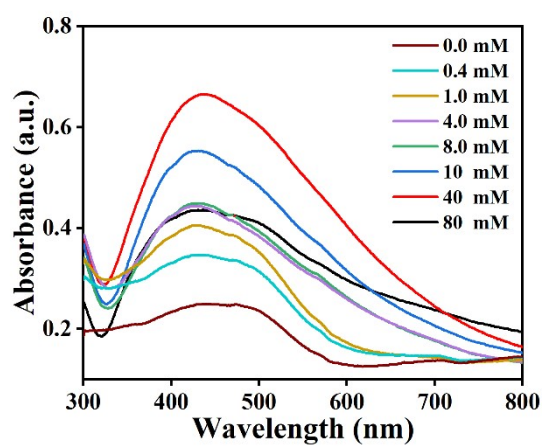

**Figure S2.** UV-vis spectrum of NaOH at different concentrations.

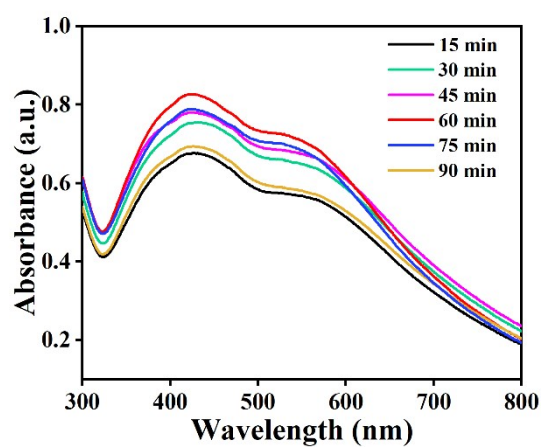

**Figure S3.** UV-vis spectrum at different time (from 15 to 90 min).

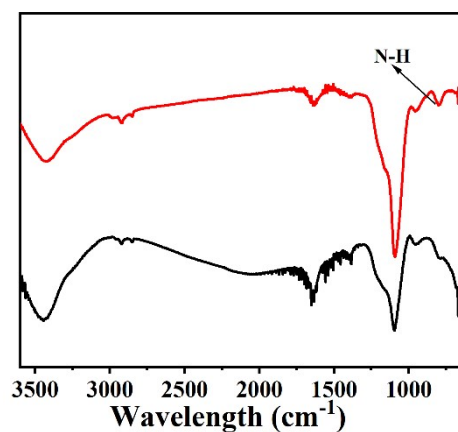

**Figure S4.** FI-RT spectrum of SiO<sub>2</sub> NPs (black curve) and Au@SiO<sub>2</sub> NPs (red curve).

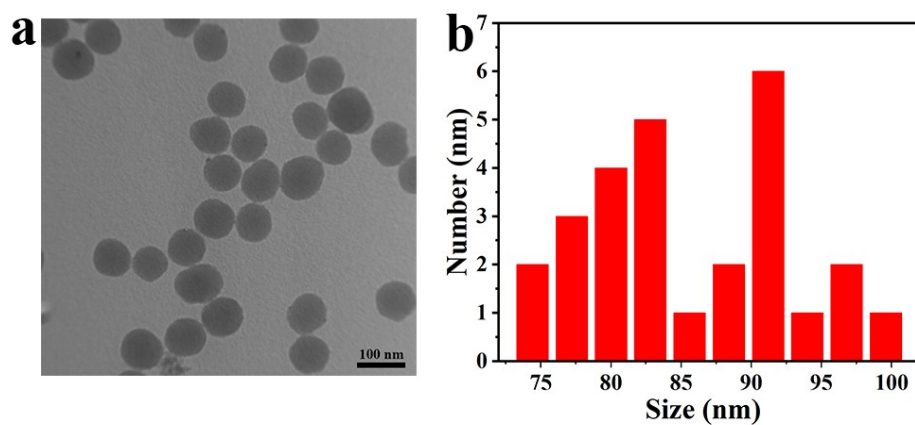

**Figure S5.** TEM image (a) and nanoparticle size distribution (b) of SiO<sub>2</sub> NPs.

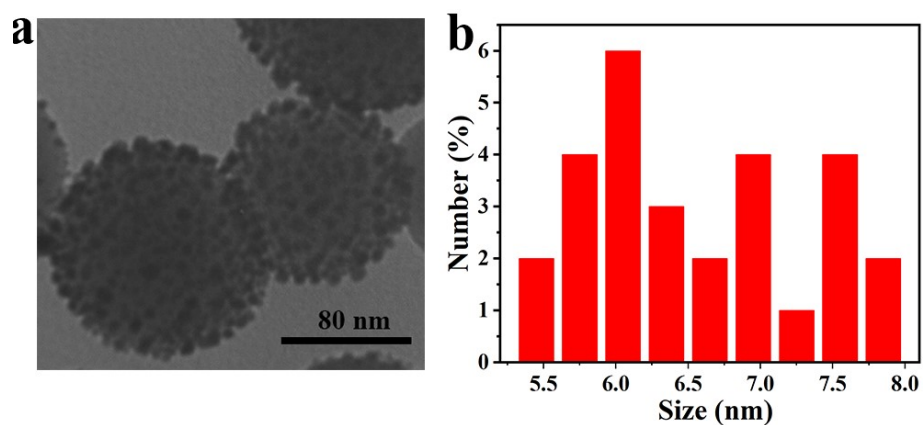

**Figure S6.** (a) TEM image of Au@SiO<sub>2</sub> NPs. (b) The nanoparticle size distribution of Au NPs.

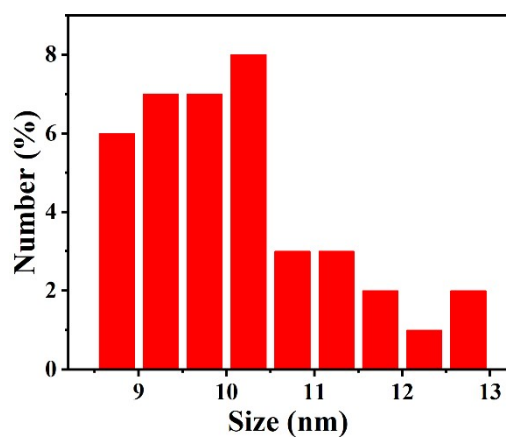

**Figure S7.** The nanoparticle size distribution of Ag@Au NPs.

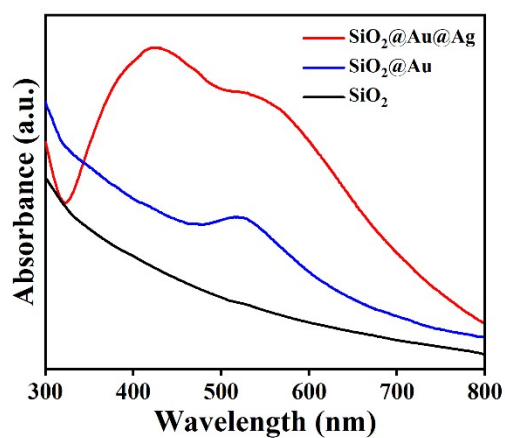

**Figure S8.** UV-vis spectrum of SiO<sub>2</sub>, Au@SiO<sub>2</sub> NPs, and Ag@Au@SiO<sub>2</sub> NPs.

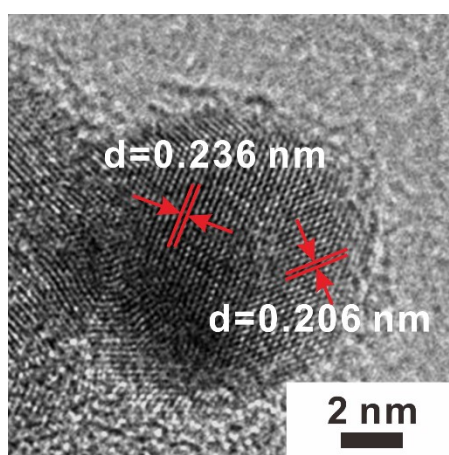

**Figure S9.** HRTEM image collected from the satellite structure.

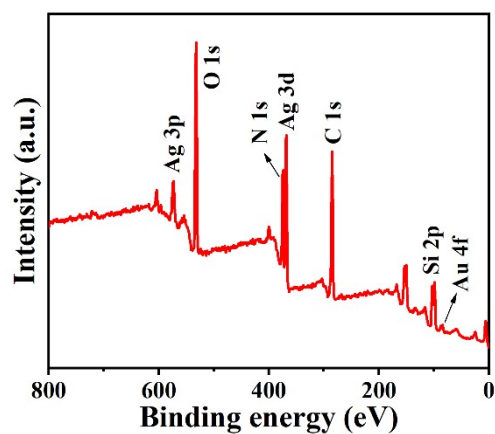

Figure S10. XPS spectra of Ag@Au@SiO<sub>2</sub> NPs.

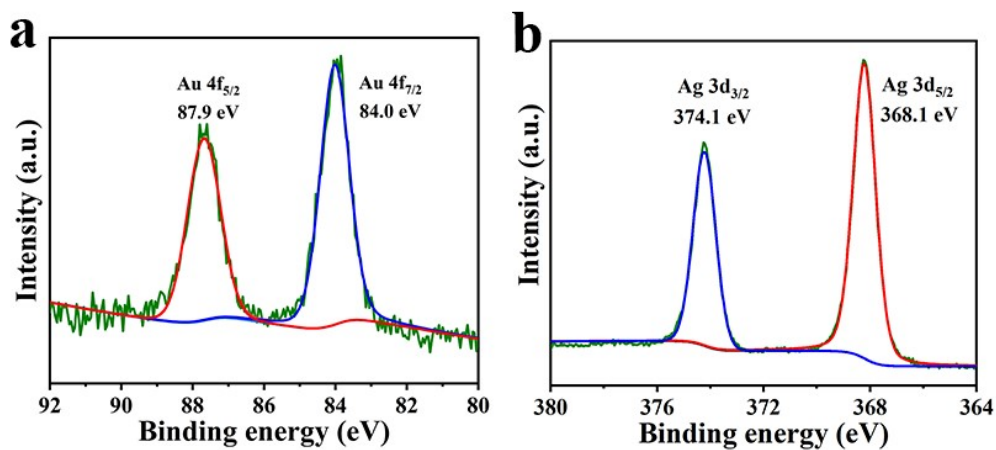

Figure S11. XPS spectra of (a) Au 4f and (b) Ag 3d in the Ag@Au@SiO<sub>2</sub> NPs.

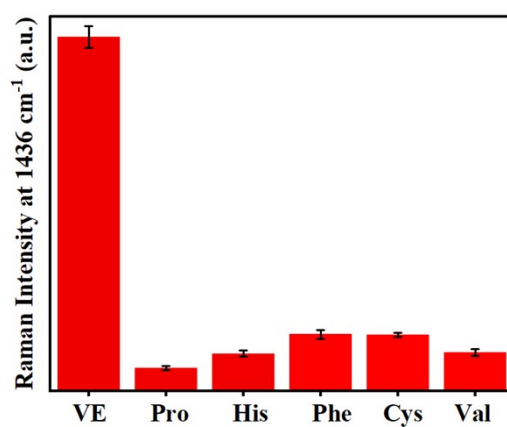

Figure S12. The histogram of different substances including 40 mM VE, Pro, His, Phe, Cys, and Val.



---

## References

1 H.Liu, L. Wei, J. Hua, D. Chen, H. Meng, Z. Li, L. Xiao, *Nanoscale*. 2020, **12**, 12390-10398.
